# Supplementary material for: Involvement of Auxin and Brassinosteroid in Dwarfism of Autotetraploid Apple (Malus × domestica)
Source: PubMed Central journal article supplement (PMC4877651; doi:10.1038/srep26719), 2016-05-24
Supplement: srep26719-s1.pdf [file srep26719-s1.pdf]

**Involvement of Auxin and Brassinosteroid in Dwarfism of Autotetraploid Apple (*Malus × domestica*)**

**Yue Ma<sup>1</sup>, Hao Xue<sup>1</sup>, Lei Zhang<sup>1</sup>, Feng Zhang<sup>1</sup>, Chunqing Ou<sup>2</sup>, Feng Wang<sup>3</sup>, Zhihong Zhang<sup>1\*</sup>**

<sup>1</sup>College of Horticulture, Shenyang Agricultural University, 120 Dongling Road, Shenyang 110866, China

<sup>2</sup>Research Institution of Pomology, Chinese Academy of Agricultural Sciences, Xingcheng, Liaoning 125100, China

<sup>3</sup>College of Plant Protection, Shenyang Agricultural University, 120 Dongling Road, Shenyang 110866, China

\* corresponding author email zhang\_sau@163.com, +86-24-88342261

**Supplemental Table 1 Primers used to perform quantitative RT-PCR for assay of gene and miRNAs**

| Name          | Sequence (5'-3') |                                                                 |
|---------------|------------------|-----------------------------------------------------------------|
| <i>AUX1</i>   | RT primer:       | Oligo d(T)18; random primer (9 mer)                             |
|               | PCR primer       | Forward: GATGCATGAGACCAAGAGCA<br>Reverse: GGTGGTTTCTCCACAGCATT  |
| <i>MdARF3</i> | RT primer:       | Oligo d(T)18; random primer (9 mer)                             |
|               | PCR primer       | Forward: AGAAAGGGACTGTGGTGGTG<br>Reverse: CATTGCCTCAACATCCTCCT  |
| <i>GA2ox</i>  | RT primer:       | Oligo d(T)18; random primer (9 mer)                             |
|               | PCR primer       | Forward: GAGAGCACACAGACCCACAA<br>Reverse: TGGTCCCCCAAATAAATCA   |
| <i>DELLA</i>  | RT primer:       | Oligo d(T)18; random primer (9 mer)                             |
|               | PCR primer       | Forward: ATCCAGCGACTTGGAGCTTA<br>Reverse: GGCTGCCATGTAACCAAACCT |
| <i>GID2</i>   | RT primer:       | Oligo d(T)18; random primer (9 mer)                             |
|               | PCR primer       | Forward: ATGATCGGCAAGGAAACAAC<br>Reverse: TGGGTAATATGGAGGGTGGA  |
| <i>DWF4</i>   | RT primer:       | Oligo d(T)18; random primer (9 mer)                             |
|               | PCR primer       | Forward: TGATGATCCTTTGGCATTCA<br>Reverse: AGACCGGGAGTTCGGACTAT  |
| <i>BKII</i>   | RT primer:       | Oligo d(T)18; random primer (9 mer)                             |
|               | PCR primer       | Forward: GCAGGCATGAAGAAGAAAGG<br>Reverse: ATCAATGGCGAAAGAAGGTG  |
| <i>BSK</i>    | RT primer:       | Oligo d(T)18; random primer (9 mer)                             |
|               | PCR primer       | Forward: CCCC GTTTC AAAACAGAAA<br>Reverse: CGGCACCTTCTCATCTTTA  |
| <i>BIN2</i>   | RT primer:       | Oligo d(T)18; random primer (9 mer)                             |

|                  |                                 |          |                                                   |       |  |
|------------------|---------------------------------|----------|---------------------------------------------------|-------|--|
|                  | PCR primer                      | Forward: | CGGGTAACCAGTTTTCTGGA                              |       |  |
|                  |                                 | Reverse: | CTGCACATTTGTTGGTTTGG                              |       |  |
| <i>miR390</i>    | RT primer:                      |          | CTCAACTGGTGTCGTGGAGTCCGGCAATT<br>CAGTTGAGGGCGCTAT |       |  |
|                  | PCR primer                      | Forward: | AACTGGTGTCTGGAG                                   |       |  |
|                  |                                 | Reverse: | AACTGGTGTCTGGAG                                   |       |  |
|                  | Probe                           |          | FAM-TTCAGTTGAGGGCGATAT-TAMRA                      |       |  |
| <i>MdTAS3-1a</i> | RT primer:                      |          | CTCAACTGGTGTCGTGGAGTCCGGCAATT<br>CAGTTGAGAAGACCTT |       |  |
|                  | PCR primer                      | Forward: | AGGTGGTGGTTGATGGGAAT                              |       |  |
|                  |                                 | Reverse: | AACAAAGACAACAGACCCGG                              |       |  |
|                  | Probe                           |          | FAM-TTCAGTTGAGAAGACCTT-TAMRA                      |       |  |
| <i>18s</i>       | RT primer:                      |          | Oligo d(T)18; random primer (9 mer)               |       |  |
|                  | PCR primer                      | Forward: | GTAGTCATATGCTTGTCT                                |       |  |
|                  |                                 | Reverse: | GAATGATGCGTCGCCAGCACAAAGG                         |       |  |
|                  | Probe                           |          | FAM-CAGAAGTCGGGATTTGTTGC-TAMRA                    |       |  |
| FAM              | 6-carboxy-fluorescein,          | reporter | fluorophore,                                      | TAMRA |  |
|                  | 6-carboxy-tetramethylrhodamine, | quencher | fluorophore                                       |       |  |
